# Supplementary material for: Testing the Utility of Polygenic Risk Scores for Type 2 Diabetes and Obesity in Predicting Metabolic Changes in a Prediabetic Population: An Observational Study
Source: MDPI journal article supplement (doi:10.3390/ijms232416081), 2022-12-16
Supplement: s1 [file s1]

## SUPPLEMENTARY MATERIAL

**Supplementary Table S1.** Genetic variants included in the T2D PRS.

| SNP        | Locus    | CHR | Pos       | Alt Allele | $\beta$ | Odd Ratio | MAF   | P-value   | N       |
|------------|----------|-----|-----------|------------|---------|-----------|-------|-----------|---------|
| rs3101336  | NEGR1    | 1   | 72751185  | C          | 0.018   | 1.018     | 0.450 | 3.07E-02  | 939912  |
| rs2568958  | NEGR1    | 1   | 72765116  | A          | 0.022   | 1.022     | 0.438 | 1.64E-04  | 1082380 |
| rs2815752  | NEGR1    | 1   | 72812440  | A          | 0.022   | 1.022     | 0.388 | 4.05E-04  | 1084120 |
| rs10913469 | SEC16B   | 1   | 177913519 | C          | 0.032   | 1.033     | 0.163 | 1.74E-12  | 1073630 |
| rs340874   | PROX1    | 1   | 214159256 | C          | 0.047   | 1.048     | 0.475 | 6.11E-32  | 1081640 |
| rs2605100  | LYPLAL1  | 1   | 219644224 | G          | 0.030   | 1.031     | 0.213 | 3.75E-07  | 1090350 |
| rs12022722 | LYPLAL1  | 1   | 219651133 | T          | 0.020   | 1.020     | 0.413 | 7.57E-06  | 917427  |
| rs2820464  | LYPLAL1  | 1   | 219693220 | A          | -0.029  | 0.972     | 0.175 | 4.82E-10  | 927501  |
| rs2785980  | LYPLAL1  | 1   | 219700519 | C          | -0.031  | 0.969     | 0.175 | 1.30E-13  | 1039880 |
| rs4846567  | SLC30A10 | 1   | 219750717 | T          | -0.033  | 0.967     | 0.125 | 1.17E-15  | 1078840 |
| rs6548238  | TMEM18   | 2   | 634905    | C          | 0.054   | 1.055     | 0.113 | 1.66E-21  | 1083220 |
| rs7561317  | TMEM18   | 2   | 644953    | G          | 0.056   | 1.058     | 0.238 | 2.67E-22  | 1023140 |
| rs780094   | GCKR     | 2   | 27741237  | C          | 0.053   | 1.055     | 0.488 | 2.05E-34  | 1082280 |
| rs13389219 | GRB14    | 2   | 165528876 | T          | -0.054  | 0.947     | 0.400 | 5.98E-35  | 1080230 |
| rs7607980  | GRB14    | 2   | 165551201 | C          | -0.068  | 0.935     | 0.138 | 1.75E-19  | 851502  |
| rs1801282  | PPARG    | 3   | 12393125  | G          | -0.022  | 0.978     | 0.263 | 4.85E-02  | 18252   |
| rs11708067 | ADCY5    | 3   | 123065778 | G          | -0.072  | 0.930     | 0.100 | 1.06E-44  | 756464  |
| rs11920090 | SLC2A2   | 3   | 170717521 | A          | -0.027  | 0.974     | 0.188 | 1.47E-03  | 952836  |
| rs4402960  | IGF2BP2  | 3   | 185511687 | T          | 0.096   | 1.101     | 0.425 | 4.15E-122 | 1088690 |
| rs7647305  | ETV5     | 3   | 185834290 | C          | 0.026   | 1.027     | 0.213 | 7.70E-07  | 965163  |
| rs10938397 | GNPDA2   | 4   | 45182527  | G          | 0.038   | 1.039     | 0.388 | 5.11E-17  | 1048050 |
| rs10946398 | CDKAL1   | 6   | 20661034  | C          | 0.113   | 1.120     | 0.375 | 5.97E-144 | 1085220 |
| rs2844479  | AIF1     | 6   | 31572956  | C          | 0.026   | 1.027     | 0.500 | 4.49E-09  | 1078460 |
| rs2260000  | PRRC2A   | 6   | 31593476  | G          | 0.020   | 1.020     | 0.375 | 2.71E-05  | 930840  |
| rs1077393  | BAG6     | 6   | 31610529  | G          | 0.019   | 1.019     | 0.500 | 1.41E-04  | 1081460 |
| rs2191349  | DGKB     | 7   | 15064309  | T          | 0.051   | 1.053     | 0.488 | 1.23E-41  | 1081160 |
| rs4607517  | YKT6     | 7   | 44235668  | A          | 0.032   | 1.032     | 0.088 | 2.65E-10  | 1082060 |
| rs4731702  | KLF14    | 7   | 130433384 | T          | -0.037  | 0.964     | 0.475 | 1.09E-20  | 1075480 |
| rs972283   | KLF14    | 7   | 130466854 | G          | 0.035   | 1.036     | 0.463 | 5.05E-20  | 1067780 |
| rs13266634 | SLC30A8  | 8   | 118184783 | T          | -0.091  | 0.913     | 0.388 | 2.45E-124 | 1181190 |
| rs11558471 | SLC30A8  | 8   | 118185733 | G          | -0.088  | 0.916     | 0.313 | 8.78E-106 | 1082770 |
| rs7034200  | GLIS3    | 9   | 4289050   | A          | 0.040   | 1.041     | 0.488 | 1.20E-23  | 1070410 |
| rs10811661 | GLIS3    | 9   | 22134094  | C          | -0.140  | 0.869     | 0.113 | 2.88E-146 | 930908  |
| rs1111875  | HHEX     | 10  | 94462882  | T          | -0.093  | 0.912     | 0.388 | 7.30E-95  | 938378  |
| rs5015480  | HHEX     | 10  | 94465559  | T          | -0.089  | 0.915     | 0.388 | 1.64E-128 | 1069430 |
| rs7923837  | HHEX     | 10  | 94481917  | A          | -0.094  | 0.911     | 0.350 | 1.62E-75  | 888616  |
| rs10885122 | ADRA2A   | 10  | 113042093 | G          | 0.024   | 1.024     | 0.125 | 1.03E-05  | 1082070 |
| rs7901695  | TCF7L2   | 10  | 114754088 | C          | 0.207   | 1.230     | 0.313 | 5.82E-226 | 209644  |

|            |                |    |           |   |        |       |       |           |         |
|------------|----------------|----|-----------|---|--------|-------|-------|-----------|---------|
| rs4506565  | <i>TCF7L2</i>  | 10 | 114756041 | T | 0.216  | 1.241 | 0.313 | 6.14E-229 | 208956  |
| rs7903146  | <i>TCF7L2</i>  | 10 | 114758349 | T | 0.235  | 1.265 | 0.275 | 2.64E-97  | 249463  |
| rs5215     | <i>KCNJ11</i>  | 11 | 17408630  | T | -0.056 | 0.945 | 0.363 | 5.74E-52  | 1192080 |
| rs4074134  | <i>BDNF</i>    | 11 | 27647285  | T | -0.023 | 0.978 | 0.150 | 1.59E-05  | 937741  |
| rs4923461  | <i>BDNF</i>    | 11 | 27656910  | G | -0.019 | 0.981 | 0.150 | 3.05E-05  | 931716  |
| rs925946   | <i>BDNF</i>    | 11 | 27667202  | G | 0.000  | 1.000 | 0.363 | 2.44E-05  | 951966  |
| rs10501087 | <i>BDNF</i>    | 11 | 27670108  | C | -0.023 | 0.977 | 0.150 | 2.81E-06  | 934,105 |
| rs6265     | <i>BDNF</i>    | 11 | 27679916  | T | -0.022 | 0.978 | 0.138 | 9.00E-07  | 1169040 |
| rs10835211 | <i>BDNF</i>    | 11 | 27701365  | A | 0.022  | 1.103 | 0.213 | 1.83E-02  | 818173  |
| rs11605924 | <i>CRY2</i>    | 11 | 45873091  | C | -0.021 | 0.979 | 0.450 | 4.96E-08  | 964253  |
| rs10838738 | <i>MTCH2</i>   | 11 | 47663049  | G | 0.013  | 1.013 | 0.363 | 5.75E-03  | 1085580 |
| rs174550   | <i>FADS1</i>   | 11 | 61571478  | C | -0.027 | 0.973 | 0.350 | 1.20E-10  | 1019910 |
| rs10830963 | <i>MTNR1B</i>  | 11 | 92708710  | G | 0.061  | 1.063 | 0.225 | 7.36E-43  | 1059540 |
| rs7138803  | <i>BCDIN3D</i> | 12 | 50247468  | A | 0.023  | 1.023 | 0.425 | 1.35E-09  | 1089630 |
| rs8049439  | <i>ATXN2L</i>  | 16 | 28837515  | C | 0.019  | 1.019 | 0.413 | 2.76E-05  | 1191610 |
| rs4788102  | <i>SH2B1</i>   | 16 | 28873398  | A | 0.022  | 1.022 | 0.413 | 8.70E-06  | 933067  |
| rs7498665  | <i>SH2B1</i>   | 16 | 28883241  | G | 0.022  | 1.023 | 0.400 | 1.86E-06  | 1024050 |
| rs6499640  | <i>FTO</i>     | 16 | 53769677  | A | 0.027  | 1.027 | 0.425 | 5.97E-08  | 1080780 |
| rs8050136  | <i>FTO</i>     | 16 | 53816275  | A | 0.094  | 1.098 | 0.488 | 8.61E-102 | 1090360 |
| rs3751812  | <i>FTO</i>     | 16 | 53818460  | T | 0.096  | 1.100 | 0.488 | 2.47E-76  | 935802  |
| rs9939609  | <i>FTO</i>     | 16 | 53820527  | A | 0.092  | 1.096 | 0.488 | 5.44E-131 | 1063990 |
| rs7190492  | <i>FTO</i>     | 16 | 53828752  | G | 0.048  | 1.049 | 0.325 | 8.44E-18  | 937716  |
| rs8044769  | <i>FTO</i>     | 16 | 53839135  | C | 0.061  | 1.062 | 0.438 | 2.73E-31  | 937714  |
| rs633265   | <i>MC4R</i>    | 18 | 57831468  | T | 0.039  | 1.040 | 0.413 | 1.05E-18  | 931300  |
| rs1350341  | <i>MC4R</i>    | 18 | 57842533  | A | 0.038  | 1.039 | 0.400 | 5.37E-18  | 926826  |
| rs17782313 | <i>MC4R</i>    | 18 | 57851097  | C | 0.055  | 1.057 | 0.238 | 1.46E-35  | 1088670 |
| rs12970134 | <i>MC4R</i>    | 18 | 57884750  | A | 0.050  | 1.051 | 0.300 | 2.83E-28  | 1089600 |
| rs29941    | <i>KCTD15</i>  | 19 | 34309532  | G | 0.001  | 1.001 | 0.338 | 1.36E-04  | 1082030 |
| rs11084753 | <i>KCTD16</i>  | 19 | 34322137  | G | 0.011  | 1.011 | 0.363 | 2.61E-03  | 1047670 |
| rs2287019  | <i>QPCTL</i>   | 19 | 46202172  | T | 0.021  | 1.021 | 0.213 | 1.00E-04  | 1149250 |

T2D = type 2 diabetes, PRS = polygenic risk-score SNP = single nucleotide polymorphism, CHR = , Pos = position based on human genome 19, MAF = minor allele frequency, P value = statistical significant associations of SNPs in GWAS for type 2 diabetes (<https://t2d.hugeamp.org/>), N = Effective sample size from all the dataset where the P-value was significant.

**Supplementary Table S2.** Genetic variants included in the Obesity PRS

| SNP        | Locus         | CHR | Pos       | Alt Allele | $\beta$ | Odd Ratio | MAF    | P-value  | N     |
|------------|---------------|-----|-----------|------------|---------|-----------|--------|----------|-------|
| rs7561317  | <i>TMEM18</i> | 2   | 644953    | G          | 0.141   | 1.151     | 0.2451 | 1.38E-04 | 11743 |
| rs10938397 | <i>GNPDA2</i> | 4   | 45182527  | G          | 0.099   | 1.104     | 0.4549 | 2.60E-04 | 11743 |
| rs7903146  | <i>TCF7L2</i> | 10  | 114758349 | T          | -0.101  | 0.904     | 0.2280 | 3.16E-03 | 11743 |
| rs4074134  | <i>BDNF</i>   | 11  | 27647285  | T          | -0.163  | 0.850     | 0.2280 | 7.37E-06 | 11743 |
| rs4923461  | <i>BDNF</i>   | 11  | 27656910  | G          | -0.163  | 0.850     | 0.2232 | 6.98E-06 | 11743 |
| rs925946   | <i>BDNF</i>   | 11  | 27667202  | G          | -0.088  | 0.915     | 0.2610 | 1.88E-03 | 11743 |
| rs10501087 | <i>BDNF</i>   | 11  | 27670108  | C          | -0.162  | 0.850     | 0.2220 | 8.07E-06 | 11743 |
| rs6265     | <i>BDNF</i>   | 11  | 27679916  | T          | -0.164  | 0.849     | 0.2061 | 1.17E-05 | 11743 |
| rs10835211 | <i>BDNF</i>   | 11  | 27701365  | A          | 0.098   | 1.103     | 0.1915 | 2.04E-03 | 11743 |
| rs8049439  | <i>ATXN2L</i> | 16  | 28837515  | C          | 0.087   | 1.091     | 0.4305 | 1.39E-03 | 11743 |
| rs4788102  | <i>SH2B1</i>  | 16  | 28873398  | A          | 0.094   | 1.099     | 0.4256 | 5.71E-04 | 11743 |
| rs7498665  | <i>SH2B1</i>  | 16  | 28883241  | G          | 0.094   | 1.099     | 0.4207 | 5.65E-04 | 11743 |
| rs8050136  | <i>FTO</i>    | 16  | 53816275  | A          | 0.205   | 1.228     | 0.4915 | 9.23E-14 | 11743 |
| rs3751812  | <i>FTO</i>    | 16  | 53818460  | T          | 0.206   | 1.229     | 0.4902 | 6.42E-14 | 11743 |
| rs9939609  | <i>FTO</i>    | 16  | 53820527  | A          | 0.207   | 1.231     | 0.4890 | 5.07E-14 | 11743 |
| rs7190492  | <i>FTO</i>    | 16  | 53828752  | G          | 0.126   | 1.134     | 0.3232 | 5.28E-06 | 11743 |
| rs8044769  | <i>FTO</i>    | 16  | 53839135  | C          | 0.162   | 1.176     | 0.4195 | 1.76E-09 | 11743 |
| rs9921518  | <i>IRX3</i>   | 16  | 54494424  | G          | -0.105  | 0.900     | 0.2488 | 6.11E-03 | 11743 |
| rs17782313 | <i>MC4R</i>   | 18  | 57851097  | C          | 0.102   | 1.107     | 0.1768 | 3.42E-03 | 11743 |
| rs12970134 | <i>MC4R</i>   | 18  | 57884750  | A          | 0.099   | 1.104     | 0.2134 | 3.66E-03 | 11743 |
| rs29941    | <i>KCTD15</i> | 19  | 34309532  | G          | 0.061   | 1.063     | 0.3073 | 2.77E-02 | 11743 |

PRS = polygenic risk-score SNP = single nucleotide polymorphism, CHR = , Pos = position based on human genome 19, MAF = minor allele frequency, P value = statistical significant associations of SNPs in GWAS for Obesity (<https://t2d.hugeamp.org/>), N = Effective sample size, DataSet: FinnGen 2018 GWAS: European ancestry ([https://t2d.hugeamp.org/dinspector.html?dataset=GWAS\\_FinnGen\\_eu&phenotype=Obesity](https://t2d.hugeamp.org/dinspector.html?dataset=GWAS_FinnGen_eu&phenotype=Obesity)).

**Supplementary Table S3.** Association of T2D PRS with the baseline metabolic parameters in PolRed.

| Metabolic Parameter      | $\beta$ (95% CI)          | <i>P</i> §    |
|--------------------------|---------------------------|---------------|
| BMI (kg/m <sup>2</sup> ) | 0.0066 (-0.0020, 0.0112)  | <b>0.0053</b> |
| FFM (kg)                 | 0.0029 (-0.0001, 0.0056)  | <b>0.0394</b> |
| FM (kg)                  | 0.0028 (-0.0003, 0.0053)  | <b>0.0293</b> |
| MM (kg)                  | -0.0045 (-0.0091, 0.0001) | 0.0535        |
| VF (cm <sup>3</sup> )    | -0.0004 (-0.0009, 0.0001) | 0.0662        |
| SF (cm <sup>3</sup> )    | -0.0003 (-0.0007, 0.0001) | 0.1360        |
| VAT/SAT ratio            | -0.0544 (-0.1436, 0.0348) | 0.2310        |
| IPAQ (min/week)          | 0.0002 (-0.0002, 0.0005)  | 0.4450        |
| Fasting glucose (mg/dl)  | 0.0024 (-0.0001, 0.0047)  | <b>0.0451</b> |
| 2-hour glucose (mg/dl)   | 0.0001 (-0.0008, 0.0009)  | 0.8990        |
| HbA1c (%)                | -0.0171 (-0.0629, 0.0288) | 0.4650        |
| Fasting insulin (uU/ml)  | 0.0033 (-0.0003, 0.0063)  | <b>0.0320</b> |
| 2-hour insulin (uU/ml)   | -0.0001 (-0.0008, 0.0006) | 0.7740        |
| Chol (mg/dL)             | 0.3426 (-0.8705, 1.5558)  | 0.5790        |
| Tg (mg/dL)               | -0.0683 (-0.3109, 0.1744) | 0.5800        |
| Hdl (mg/dL)              | -0.3415 (-1.5546, 0.8716) | 0.5800        |
| Ldl (mg/dL)              | -0.3428 (-1.556, 0.8704)  | 0.5790        |

BMI: Body mass index; FFM: fat free mass; FM: fat mass; MM: muscle mass; VF: visceral fat; SF: subcutaneous fat; VAT: visceral adipose tissue; SAT: subcutaneous adipose tissue; IPAQ: International Physical Activity Questionnaire; HbA1c: glycated hemoglobin; Chol: total cholesterol; Tg: triglycerides; Hdl: high-density lipoprotein; Ldl: low-density lipoproteins.  $\beta$  values are reported per SD of polygenic score. *P*§ values of 0.05 are in bold and reflect significance after adjustment for multiple testing.

**Supplementary Table S4.** Association of Obesity PRS with the baseline metabolic parameters in PolRed.

| Metabolic Parameter      | $\beta$ (95% CI)          | <i>P</i> §    |
|--------------------------|---------------------------|---------------|
| BMI (kg/m <sup>2</sup> ) | 0.0141 (-0.0028, 0.0255)  | <b>0.0145</b> |
| FFM (kg)                 | 0.0027 (-0.0259, 0.0312)  | 0.8539        |
| FM (kg)                  | 0.0043 (-0.0039, 0.0126)  | 0.3016        |
| MM (kg)                  | -0.0057 (-0.0522, 0.0409) | 0.8111        |
| VF (cm <sup>3</sup> )    | 0.0013 (-0.0006, 0.0032)  | 0.1773        |
| SF (cm <sup>3</sup> )    | -0.0008 (-0.0020, 0.0005) | 0.2489        |
| VAT/SAT ratio            | -0.2228 (-0.4980, 0.0523) | 0.1121        |
| IPAQ (min/week)          | -0.0001 (-0.0006, 0.0003) | 0.5656        |
| Fasting glucose (mg/dl)  | -0.0033 (-0.0073, 0.0006) | 0.0978        |
| 2-hour glucose (mg/dl)   | 0.0003 (-0.0012, 0.0019)  | 0.6857        |
| HbA1c (%)                | 0.0371 (-0.0256, 0.0998)  | 0.2449        |
| Fasting insulin (uU/ml)  | 0.0017 (-0.0029, 0.0063)  | 0.4560        |
| 2-hour insulin (uU/ml)   | 0.0004 (-0.0009, 0.0017)  | 0.5303        |
| Chol (mg/dL)             | 0.8328 (-0.5718, 2.2374)  | 0.2445        |
| Tg (mg/dL)               | -0.1660 (-0.4469, 0.1149) | 0.2460        |
| Hdl (mg/dL)              | -0.8329 (-2.2374, 0.5716) | 0.2444        |
| Ldl (mg/dL)              | -0.8327 (-2.2373, 0.5720) | 0.2445        |

BMI: Body mass index; FFM: fat free mass; FM: fat mass; MM: muscle mass; VF: visceral fat; SF: subcutaneous fat; VAT: visceral adipose tissue; SAT: subcutaneous adipose tissue; IPAQ: International Physical Activity Questionnaire; HbA1c: glycated hemoglobin; Chol: total cholesterol; Tg: triglycerides; Hdl: high-density lipoprotein; Ldl: low-density lipoproteins.  $\beta$  values are reported per SD of polygenic score. *P*§ values of 0.05 are in bold and reflect significance after adjustment for multiple testing.

**Supplementary Table S5.** Association of T2D PRS with changes in metabolic parameters with gender stratification.

| Metabolic Parameter     | Female (n = 245)          |               | Male (n = 201)             |              |
|-------------------------|---------------------------|---------------|----------------------------|--------------|
|                         | $\beta$ (95% CI)          | P§            | $\beta$ (95% CI)           | P§           |
| FFM (kg)                | 0.0047 (-0.0032, 0.0126)  | 0.2453        | -0.0016(-0.0121, 0.0087)   | 0.750        |
| FM (kg)                 | 0.0068 (-0.0013, 0.0123)  | <b>0.0158</b> | 0.0024 (-0.0040, 0.0089)   | <b>0.045</b> |
| MM (kg)                 | -0.0001 (-0.0004, 0.0002) | 0.5088        | 0.0069 (-0.0079, 0.02180)  | 0.361        |
| VF (cm <sup>3</sup> )   | -0.0006 (-0.0020, 0.0008) | 0.4129        | 0.0009 (-0.0005, 0.0023)   | 0.214        |
| SF (cm <sup>3</sup> )   | 0.0004 (-0.0002, 0.0012)  | 0.1966        | -0.0003 (-0.0010, 0.0004)  | 0.397        |
| VAT/SAT ratio           | 0.0720 (-0.1583, 0.3023)  | 0.5384        | -0.1753 (-0.4043, 0.05384) | 0.133        |
| IPAQ (min/week)         | 0.0001 (-0.0002, 0.0002)  | 0.6696        | 0.0001 (-0.0002, 0.0002)   | 0.518        |
| Fasting glucose (mg/dl) | -0.0007 (-0.0044, 0.0029) | 0.6866        | -0.0005 (-0.0036, 0.0025)  | 0.706        |
| 2-hour glucose (mg/dl)  | 0.0005 (-0.0013, 0.0014)  | 0.3016        | -0.0012 (-0.0030, 0.0005)  | 0.164        |
| HbA1c (%)               | 0.105 (0.0081, 0.2018)    | 0.0937        | -0.0011 (-0.1198, 0.1176)  | 0.985        |
| Fasting insulin (uU/ml) | 0.0002 (-0.0041, 0.0045)  | 0.9248        | 0.0046 (-0.0004, 0.0097)   | 0.076        |
| 2-hour insulin (uU/ml)  | 0.0008 (-0.0004, 0.002)   | 0.202         | -0.0008 (-0.0024, 0.0008)  | 0.328        |
| Chol (mg/dL)            | -0.0301 (-0.0798, 0.0195) | 0.2337        | 0.01634 (-0.0055, 0.0382)  | 0.142        |
| Tg (mg/dL)              | 0.0056 (-0.0043, 0.01567) | 0.2632        | -0.0032 (-0.0076, 0.0011)  | 0.147        |
| Hdl (mg/dL)             | 0.0278 (-0.0218, 0.0775)  | 0.2706        | -0.0146 (-0.0364, 0.0071)  | 0.187        |
| Ldl (mg/dL)             | 0.0298 (-0.0199, 0.0795)  | 0.2391        | -0.016 (-0.0378, 0.0059)   | 0.151        |

FFM: fat free mass; FM: fat mass; MM: muscle mass; VF: visceral fat; SF: subcutaneous fat; VAT: visceral adipose tissue; SAT: subcutaneous adipose tissue; IPAQ: International Physical Activity Questionnaire; HbA1c: glycated hemoglobin; Chol: total cholesterol; Tg: triglycerides; Hdl: high-density lipoprotein; Ldl: low-density lipoproteins.  $\beta$  values are reported per SD of polygenic score. P§ values of 0.05 are in bold and reflect significance after adjustment for multiple testing.

**Supplementary Table S6.** Association of Obesity PRS with changes in metabolic parameters with gender stratification.

| Metabolic Parameter     | Female (n = 245)           |              | Male (n = 201)             |              |
|-------------------------|----------------------------|--------------|----------------------------|--------------|
|                         | $\beta$ (95% CI)           | P§           | $\beta$ (95% CI)           | P§           |
| FFM (kg)                | 0.0020 (-0.0070, 0.0111)   | 0.657        | 0.0057 (-0.0064, 0.0180)   | 0.352        |
| FM (kg)                 | 0.0064 (-0.0001, 0.0128)   | <b>0.045</b> | 0.0049 (-0.0026, 0.0125,)  | <b>0.020</b> |
| MM (kg)                 | 0.0001 (-0.0001, 0.00052)  | 0.293        | -0.0035 (-0.0211, 0.0140)  | 0.690        |
| VF (cm <sup>3</sup> )   | -0.0005 (-0.0022, 0.00115) | 0.536        | 0.0006 (-0.0010, 0.0023)   | 0.432        |
| SF (cm <sup>3</sup> )   | 0.0003 (-0.0004, 0.0012)   | 0.396        | -0.0003 (-0.0012, 0.0005)  | 0.461        |
| VAT/SAT ratio           | 0.1525 (-0.1114, 0.4163)   | 0.256        | -0.0907 (-0.3592, 0.1778)  | 0.506        |
| IPAQ (min/week)         | -0.0001 (-0.0002, 0.0002)  | 0.154        | 0.0001 (-0.0002, 0.0002)   | 0.787        |
| Fasting glucose (mg/dl) | 0.0029 (-0.0013, 0.0071)   | 0.181        | 0.0020 (-0.0015, 0.0057)   | 0.260        |
| 2-hour glucose (mg/dl)  | 0.0004 (-0.0011, 0.0019)   | <b>0.049</b> | 0.0021 (-0.0001, 0.0042,)  | <b>0.044</b> |
| HbA1c (%)               | 0.0851 (-0.0247, 0.1951)   | 0.128        | -0.0939 (-0.2340, 0.0461)  | 0.187        |
| Fasting insulin (uU/ml) | -0.0039 (-0.0094, 0.0014)  | 0.154        | 0.0003 (-0.0056, 0.0063)   | 0.910        |
| 2-hour insulin (uU/ml)  | 0.0006 (-0.0007, 0.0020)   | 0.347        | 0.0001 (-0.0018, 0.0020)   | 0.908        |
| Chol (mg/dL)            | -0.0377 (-0.0942, 0.0187)  | 0.189        | 0.0264 (0.0007, 0.0522)    | 0.044        |
| Tg (mg/dL)              | 0.0074 (-0.0038, 0.0188)   | 0.194        | -0.0055 (-0.0107, -0.0004) | 0.035        |
| Hdl (mg/dL)             | 0.0391 (-0.01732, 0.0956)  | 0.173        | -0.0260 (-0.0516, -0.0003) | 0.047        |
| Ldl (mg/dL)             | 0.0381 (-0.0183, 0.0947)   | 0.185        | -0.0257 (-0.0515, -0.0001) | 0.050        |

FFM: fat free mass; FM: fat mass; MM: muscle mass; VF: visceral fat; SF: subcutaneous fat; VAT: visceral adipose tissue; SAT: subcutaneous adipose tissue; IPAQ: International Physical Activity Questionnaire; Hba1c: glycated hemoglobin; Chol: total cholesterol; Tg: triglycerides; Hdl: high-density lipoprotein; Ldl: low-density lipoproteins.  $\beta$  values are reported per SD of polygenic score. P§ values of 0.05 are in bold and reflect significance after adjustment for multiple testing.
